# Supplementary material
Source: publisher site journal article supplement (https://www.dovepress.com/get_supplementary_file.php?f=311601.docx)
Supplement: Supplementary file 1 [file get_supplementary_file.php]

**Appendix**

**Case vignette**

“A 28-year-old man has been feeling unusually sad and down-hearted for most of the day for over 2 weeks. He doesn’t feel like eating and has lost weight. He has been unable to sleep well and slow in his activities because of which he couldn't go to work for the last two weeks. He has put off deciding and feels that even day-to-day tasks are too much for him. To him, life feels meaningless, and he doesn’t feel he is worth much as a person.”
